# Supplementary material for: Protection against death and renal failure by renin-angiotensin system blockers in patients with diabetes and kidney disease
Source: PubMed Central journal article supplement — J Renin Angiotensin Aldosterone Syst. 2016 Jul 3;17(3):1470320316656481. doi: 10.1177/1470320316656481 (PMC5843910; doi:10.1177/1470320316656481), 2016-07-03
Supplement: jraas-2016-0031.pdf [file jraas-2016-0031.pdf]

## **Supplementary**

### **FIGURE LEGENDS**

**Figure 1. Flow chart of study selection process**

**Figure 2. The mixed effect of ACEi and ARBs on all-cause mortality in patients with diabetes and kidney disease**

**Figure 3. The mixed effect of ACEi and ARBs on the risk of end-stage renal disease in patients with diabetes and kidney disease**

**Figure 4. The mixed effect of ACEi and ARBs on the risk of hyperkalemia in patients with diabetes and kidney disease**

**Figure 5. The mixed effect of ACEi and ARBs on the risk of cough in patients with diabetes and kidney disease**

## Supplementary Tables 1-6

**Table 1. Quality of the assessments made in the 8 meta-analyses included in the meta-analysis**

| Assessment of Multiple Systematic Reviews (AMSTAR) scale ratings of the 8 included systematic reviews and meta-analysis |                           |                |              |                    |                     |                  |                        |                        |
|-------------------------------------------------------------------------------------------------------------------------|---------------------------|----------------|--------------|--------------------|---------------------|------------------|------------------------|------------------------|
| AMSTAR criteria                                                                                                         | Suetonia C Palmer<br>2015 | ChengJ<br>2014 | HaoG<br>2014 | Jicheng Lv<br>2012 | P. Vejakama<br>2012 | Sharma P<br>2011 | Strippoli G. F<br>2006 | Strippoli G. F<br>2005 |
| 1. Was an 'a priori' design provided?                                                                                   | Yes                       | Yes            | Yes          | Yes                | Yes                 | Yes              | Yes                    | Yes                    |
| 2. Was there duplicate study selection and data extraction?                                                             | Yes                       | Yes            | Yes          | Yes                | Yes                 | Yes              | Yes                    | Yes                    |
| 3. Was a comprehensive literature search performed?                                                                     | Yes                       | Yes            | Yes          | Yes                | Yes                 | Yes              | Yes                    | Yes                    |
| 4. Was the status of publication used as an inclusion criterion?                                                        | Yes                       | Yes            | Yes          | No                 | No                  | Yes              | No                     | Yes                    |
| 5. Was a list of studies provided?                                                                                      | No                        | Yes            | No           | Yes                | Yes                 | Yes              | Yes                    | Yes                    |
| 6. Were the characteristics of the included studies provided?                                                           | Yes                       | Yes            | Yes          | No                 | Yes                 | No               | No                     | No                     |
| 7. Was the scientific quality of the included studies assessed and documented?                                          | Yes                       | No             | No           | Yes                | Yes                 | Yes              | Yes                    | Yes                    |
| 8. Was the scientific quality of the included studies used appropriately in formulating conclusions?                    | Yes                       | Yes            | No           | No                 | Yes                 | Yes              | Yes                    | Yes                    |
| 9. Were the methods used to combine the findings of studies appropriate?                                                | Yes                       | Yes            | Yes          | No                 | No                  | Yes              | No                     | No                     |
| 10. Was the likelihood of publication bias assessed?                                                                    | No                        | No             | No           | Yes                | Yes                 | No               | Yes                    | Yes                    |
| 11. Was the conflict of interest stated?                                                                                | Yes                       | Yes            | Yes          | Yes                | Yes                 | Yes              | Yes                    | Yes                    |
| Total score (out of 11)                                                                                                 | 9                         | 10             | 7            | 8                  | 9                   | 9                | 8                      | 9                      |
| Overall methodological quality<br>(L=low, M=moderate, H=high)                                                           | H                         | H              | M            | M                  | H                   | H                | M                      | H                      |

**Table 2. Effect of ACEi and ARBs on all-cause mortality in patients with diabetes and kidney disease**

| <b>All-cause mortality</b>         |                |                                                     |                                       |                                      |       |          |      |
|------------------------------------|----------------|-----------------------------------------------------|---------------------------------------|--------------------------------------|-------|----------|------|
| First author year                  | Country        | Disease                                             | The total number of samples<br>number | Intervention(study/patient)          |       | (95% CI) |      |
|                                    |                |                                                     |                                       | ACEi/ARBs vs Placebo                 | OR/RR | ll       | ul   |
| Suetonia C Palmer<br>et.al<br>2015 | New<br>Zealand | type 2 diabetes mellitus,<br>chronic kidney disease | 12716                                 | ACEi + calcium-channel blocker 1/335 | 0.20  | 0.01     | 4.17 |
|                                    |                |                                                     |                                       | ARBs 5/4443                          | 0.91  | 0.71     | 1.16 |
|                                    |                |                                                     |                                       | ACEi 10/7938                         | 0.85  | 0.61     | 1.19 |
| Cheng J et.al<br>2014              | China          | diabetes mellitus                                   | 43457                                 | ACEi 20/25544                        | 0.87  | 0.78     | 0.98 |
|                                    |                |                                                     |                                       | ARB 12/17913                         | 0.94  | 0.82     | 1.08 |
| Hao G et.al<br>2014                | China          | type 2 diabetes mellitus                            | 18369                                 | ARB/ACE inhibitor 7/18369            | 0.91  | 0.83     | 1    |
| Jicheng Lv et.al<br>2012           | Australia      | diabetic kidney disease                             | 19003                                 | ACEi 6/11350                         | 0.84  | 0.73     | 0.97 |
|                                    |                |                                                     |                                       | ARB 5/7653                           | 1.12  | 0.88     | 1.41 |
| Sharma P et.al<br>2011             | England        | Chronic kidney disease                              | 2177                                  | ACEi 4/2177                          | 0.71  | 0.53     | 0.96 |
| Strippoli G. F et.al<br>2006       | Australia      | diabetic kidney disease                             | 10704                                 | ACEi 21/7295                         | 0.91  | 0.71     | 1.17 |
|                                    |                |                                                     |                                       | ARBs 5/3409                          | 0.99  | 0.85     | 1.17 |
| Strippoli G. F et.al<br>2005       | Australia      | diabetic kidney disease                             | 4570                                  | ACEi 10/4570                         | 0.81  | 0.64     | 1.02 |

**Table 3. Effect of ACEi and ARBs on the risk of end-stage renal disease in patients with diabetes and kidney disease.**

| <b>End-stage renal disease</b>  |             |                                                     |                                       |                                 |       |                   |      |
|---------------------------------|-------------|-----------------------------------------------------|---------------------------------------|---------------------------------|-------|-------------------|------|
| First author year               | Country     | Disease                                             | The total number of samples<br>number | Intervention<br>(study/patient) | OR/RR | (95% CI)<br>ll ul |      |
| Suetonia C Palmer et.al<br>2015 | New Zealand | type 2 diabetes mellitus,<br>chronic kidney disease | 9807                                  | ACEi 4/6580                     | 0.73  | 0.47              | 1.14 |
|                                 |             |                                                     |                                       | ARBs 3/3227                     | 0.81  | 0.69              | 0.96 |
| Jicheng Lv et.al<br>2012        | Australia   | diabetic kidney disease                             | 10504                                 | ACEi 3/10504                    | 1.94  | 0.66              | 5.07 |
|                                 |             |                                                     |                                       | ARBs 3/6217                     | 0.5   | 0.09              | 2.71 |
| P. Vejakama et.al<br>2012       | Thailand    | type 2 diabetes mellitus                            | 12728                                 | ACEi/ARBs 6/2147                | 0.82  | 0.64              | 1.05 |
|                                 |             |                                                     |                                       | ACEi/ARBs 4/10581               | 0.8   | 0.69              | 0.93 |
| Strippoli G. F et.al<br>2006    | Australia   | diabetic kidney disease                             | 10070                                 | ACEi 10/6819                    | 0.6   | 0.39              | 0.93 |
|                                 |             |                                                     |                                       | ARBs 3/3251                     | 0.78  | 0.67              | 0.91 |

**Table 4. Effect of ACEi and ARBs on the risk of hyperkalemia in patients with diabetes and kidney disease**

| Hyperkalaemia                |             |                                                  |                                    |                              |       |          |       |
|------------------------------|-------------|--------------------------------------------------|------------------------------------|------------------------------|-------|----------|-------|
| First author year            | Country     | Disease                                          | The total number of samples number | Intervention (study/patient) | OR/RR | (95% CI) |       |
|                              |             |                                                  |                                    |                              |       | ll       | ul    |
| Suetonia C Palmer et.al 2015 | New Zealand | type 2 diabetes mellitus, chronic kidney disease | 2194                               | ARBs 2/1714                  | 2.54  | 0.94     | 6.86  |
|                              |             |                                                  |                                    | ACEi 3/480                   | 1.63  | 0.33     | 7.95  |
| Jicheng Lv et.al 2012        | Australia   | diabetic kidney disease                          | 5974                               | ACEi 3/2783                  | 2.98  | 0.47     | 18.78 |
|                              |             |                                                  |                                    | ARBs 3/3191                  | 2.3   | 0.69     | 7.71  |
| Strippoli G. F et.al 2006    | Australia   | diabetic kidney disease                          | 1219                               | ACEi 2/1219                  | 0.85  | 0.32     | 2.21  |
| Strippoli G. F et.al 2005    | Australia   | diabetic kidney disease                          | 2594                               | ACEi 2/2594                  | 2.95  | 0.31     | 28.18 |

**Table 5. Effect of ACEi and ARBs on the risk of cough in patients with diabetes and kidney disease**

| Cough                           |             |                           |                                    |              |       |          |       |
|---------------------------------|-------------|---------------------------|------------------------------------|--------------|-------|----------|-------|
| First author year               | Country     | Disease                   | The total number of samples number | Intervention | OR/RR | (95% CI) |       |
|                                 |             |                           |                                    |              |       | ll       | ul    |
| Suetonia C Palmer et.al<br>2015 | New Zealand | type 2 diabetes mellitus, | 22730                              | ARBs         | 1.40  | 0.48     | 4.13  |
|                                 |             | chronic kidney disease    |                                    | ACEi         | 2.95  | 1.93     | 4.51  |
| Jicheng Lv et.al<br>2012        | Australia   | diabetic kidney disease   | 13561                              | ACEi 6/11791 | 1.84  | 1.24     | 2.72  |
|                                 |             |                           |                                    | ARBs 2/1770  | 1.01  | 0.42     | 2.44  |
| Strippoli G. F et.al<br>2006    | Australia   | diabetic kidney disease   | 7281                               | ACEi 10/7087 | 3.17  | 2.29     | 4.38  |
|                                 |             |                           |                                    | ARBs 2/194   | 4.93  | 1        | 24.35 |
| Strippoli G. F et.al<br>2005    | Australia   | diabetic kidney disease   | 3725                               | ACEi 4/3725  | 1.79  | 1.19     | 2.69  |

**Table 6. Effect of ACEi and ARBs on the risk of headache in patients with diabetes and kidney disease**

|                              |           |                         | Headache                           |                             |              |              |              |
|------------------------------|-----------|-------------------------|------------------------------------|-----------------------------|--------------|--------------|--------------|
| First author year            | Country   | Disease                 | The total number of samples number | Intervention                | OR/RR        | (95% CI)     |              |
|                              |           |                         |                                    |                             |              | ll           | ul           |
| Jicheng Lv et.al<br>2012     | Australia | diabetic kidney disease | 13695                              | ACEi 3/10504<br>ARBs 3/3191 | 1.19<br>0.73 | 0.47<br>0.52 | 3.02<br>1.01 |
| Strippoli G. F et.al<br>2006 | Australia | diabetic kidney disease | 6186                               | ACEi 4/6186                 | 0.92         | 0.33         | 2.53         |
| Strippoli G. F et.al<br>2005 | Australia | diabetic kidney disease | 2438                               | ACEi 1/2438                 | 1.25         | 0.44         | 3.61         |

1

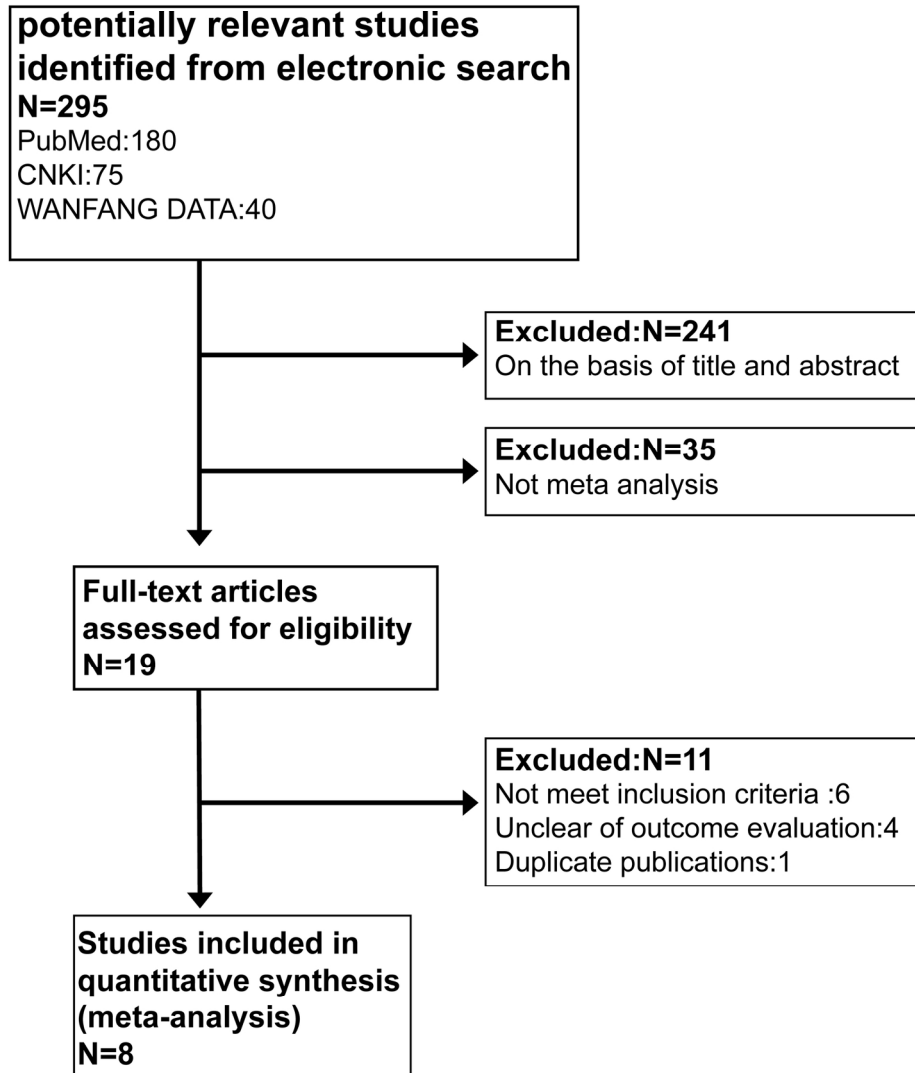

165x206mm (300 x 300 DPI)



2A

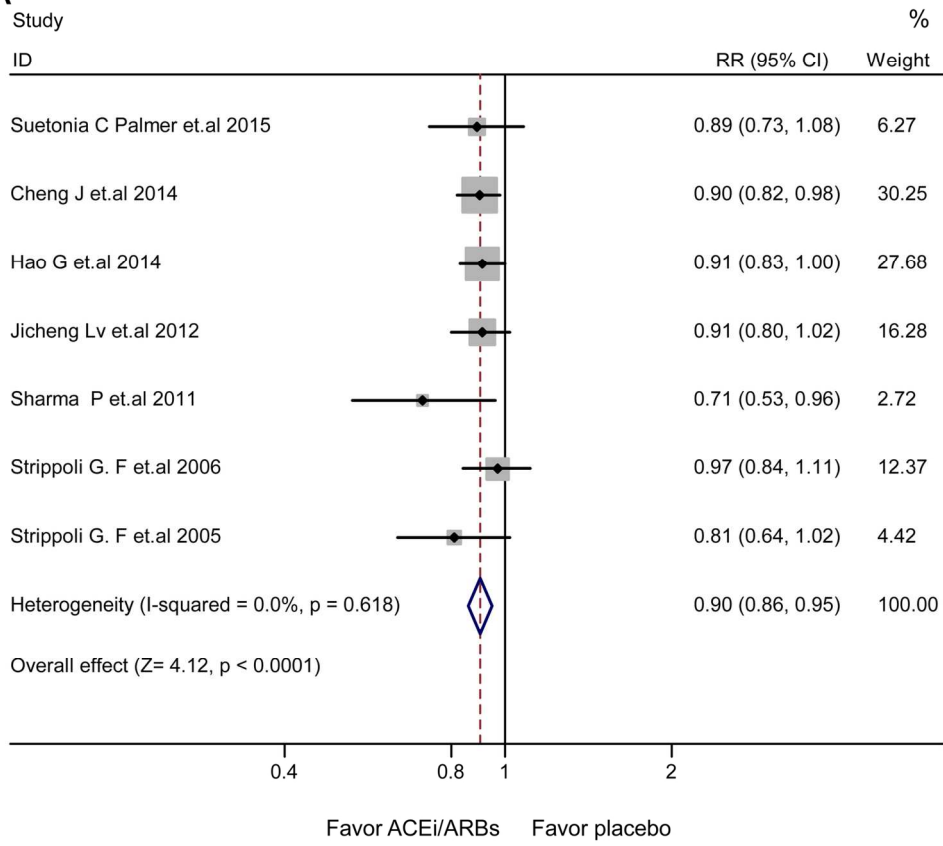

143x127mm (300 x 300 DPI)

2B

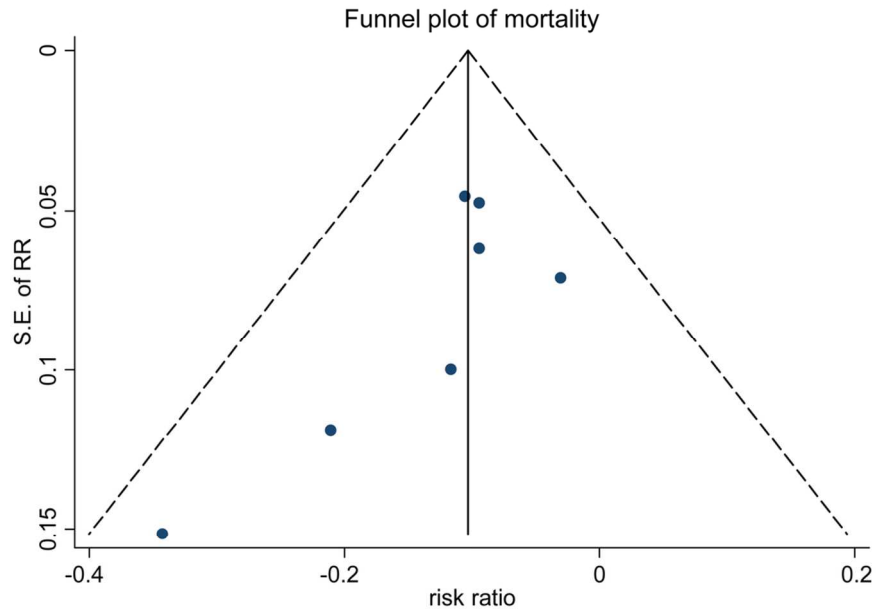

106x74mm (300 x 300 DPI)

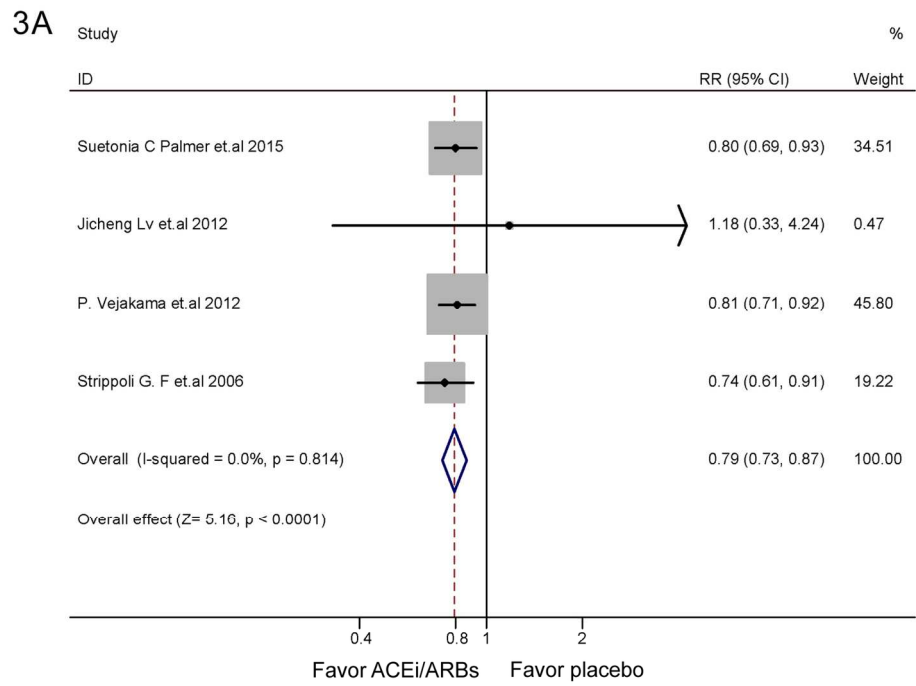

146x107mm (300 x 300 DPI)

3B

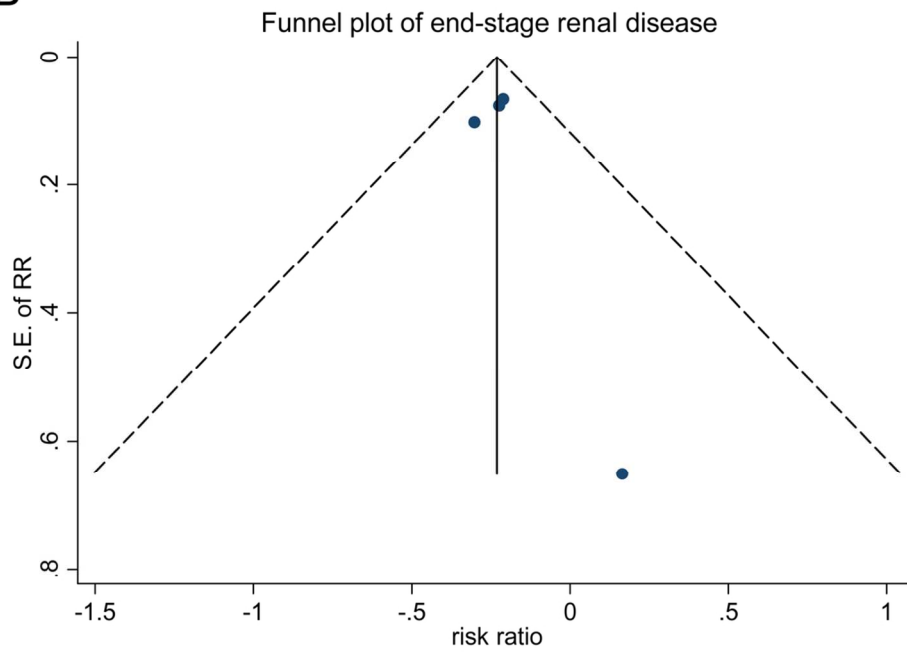

105x75mm (300 x 300 DPI)

4A

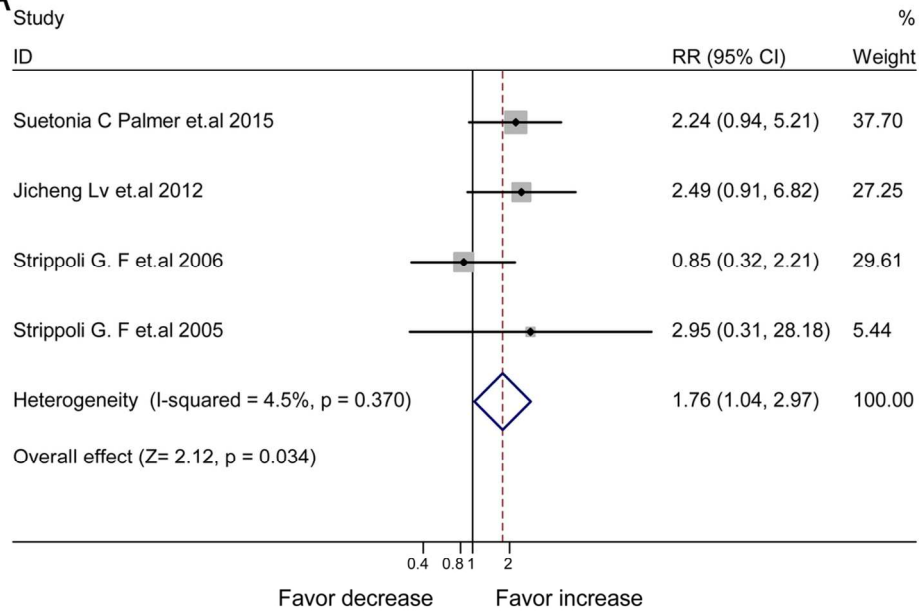

107x73mm (300 x 300 DPI)

4B

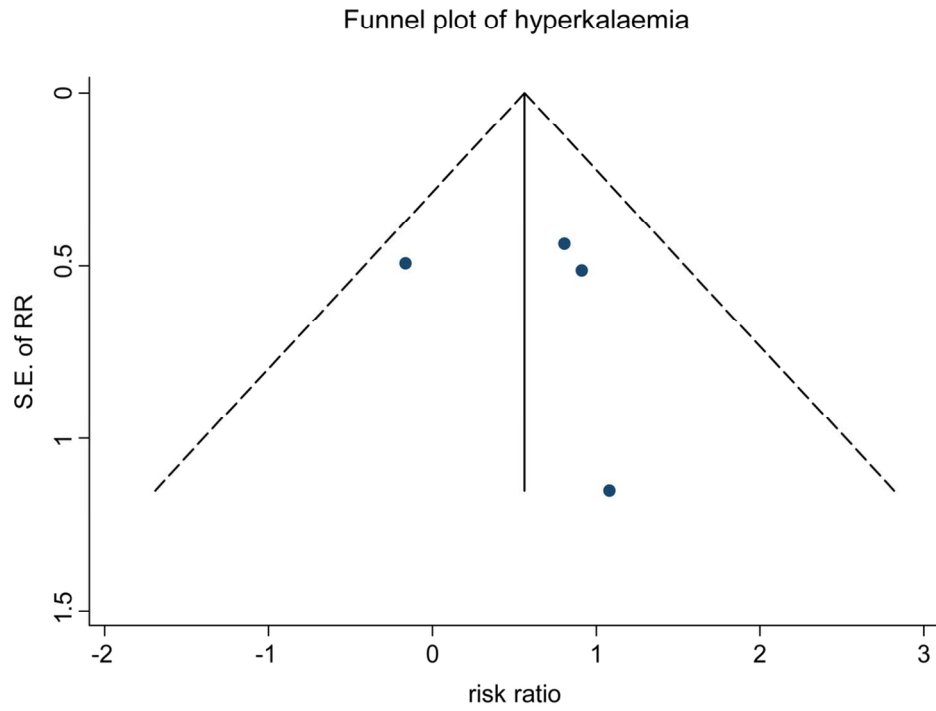

112x87mm (300 x 300 DPI)

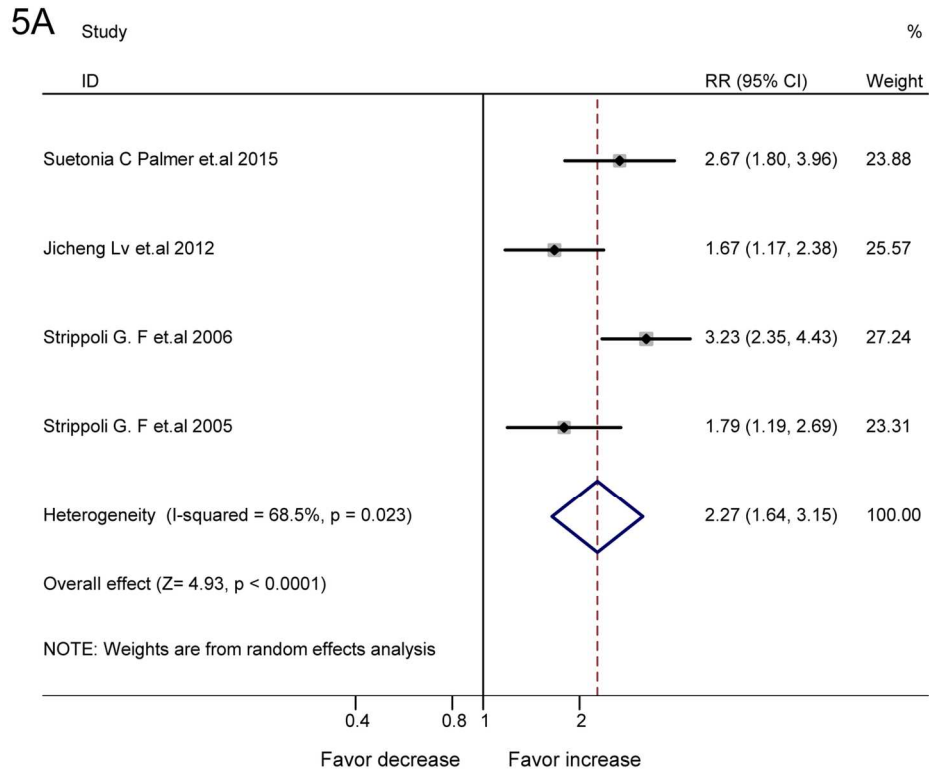

139x110mm (300 x 300 DPI)

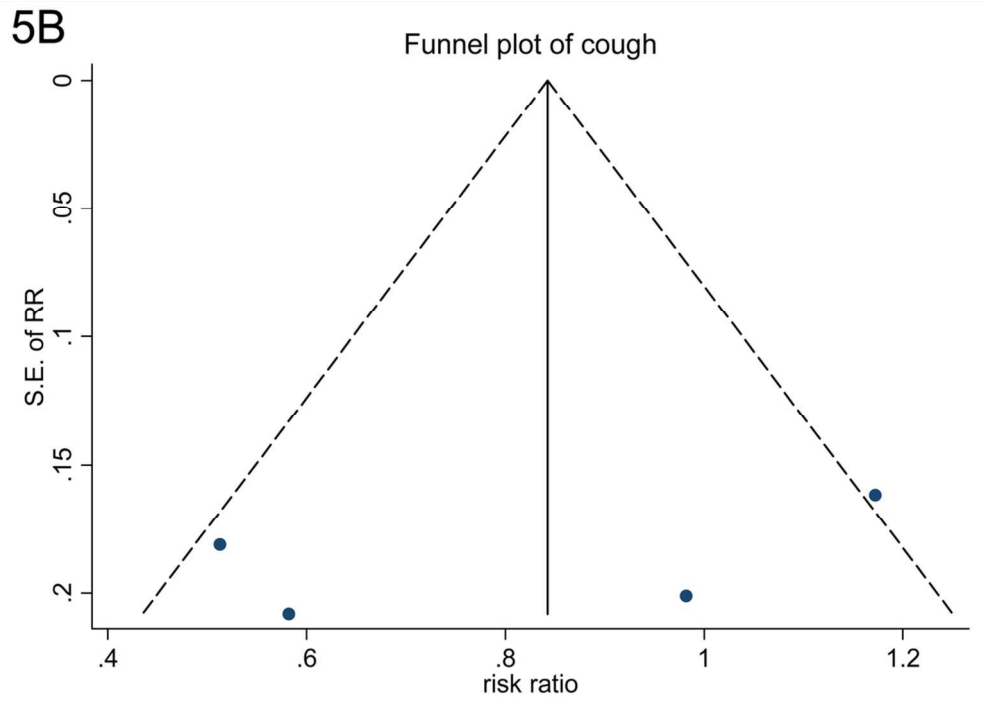

100x72mm (300 x 300 DPI)
